# Supplementary material
Source: PubMed Central journal article supplement (PMC4566271)

## Supplementary Figure

**Figure S1** The male genetic linkage map based on 1672 haplotype blocks derived from 104 single sperm genomes. The map distance for each block is on the left hand side of each linkage group, whereas the marker name is listed on the right hand side, with the number before the underscore designating the scaffold and the number after representing a randomly assigned ranking number (see supplementary data). The red squares next to marker names indicate possibly mis-assembled genomic regions in the *Daphnia arenata* reference genome. Some map positions consist of many haplotype blocks and these blocks are shown in the top left corner.

S: 42\_9,42\_10,42\_11,42\_12,42\_13,42\_14,42\_15,42\_16,  
42\_17,42\_18,42\_19,42\_20,42\_21,42\_22

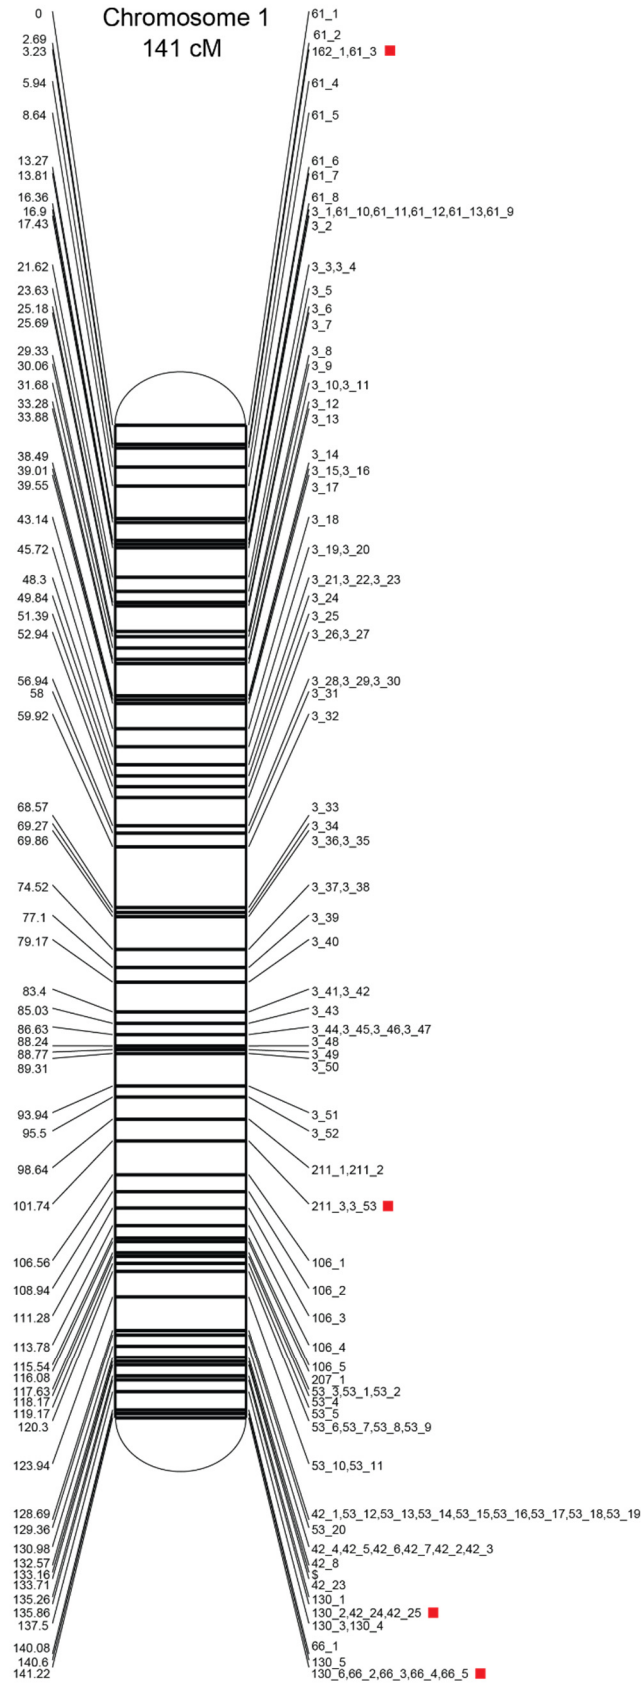

S: 112\_1,113\_1,115\_1,148\_1,170\_1,206\_1,217\_1,228\_1,  
237\_1,237\_2,266\_1,30\_16,45\_1,45\_2,73\_1,73\_2,73\_3,  
78\_3,78\_4,78\_1,78\_2

SS: 1\_36,1\_37,1\_38,1\_39,1\_40,1\_41,1\_42,1\_43,1\_44,  
1\_45,1\_46,1\_47,1\_48,1\_49,1\_50,1\_51

SSS: 1\_83,1\_84,1\_85,1\_86,1\_87,1\_88,1\_89,1\_90,1\_91,  
1\_92,1\_93,1\_94,1\_95,1\_96,1\_97,1\_82,19\_1,19\_2

SSSS: 19\_8,19\_9,74\_14,74\_15,74\_16,74\_17,74\_18,  
74\_19,74\_20,74\_21,74\_11,74\_12,74\_13,74\_10

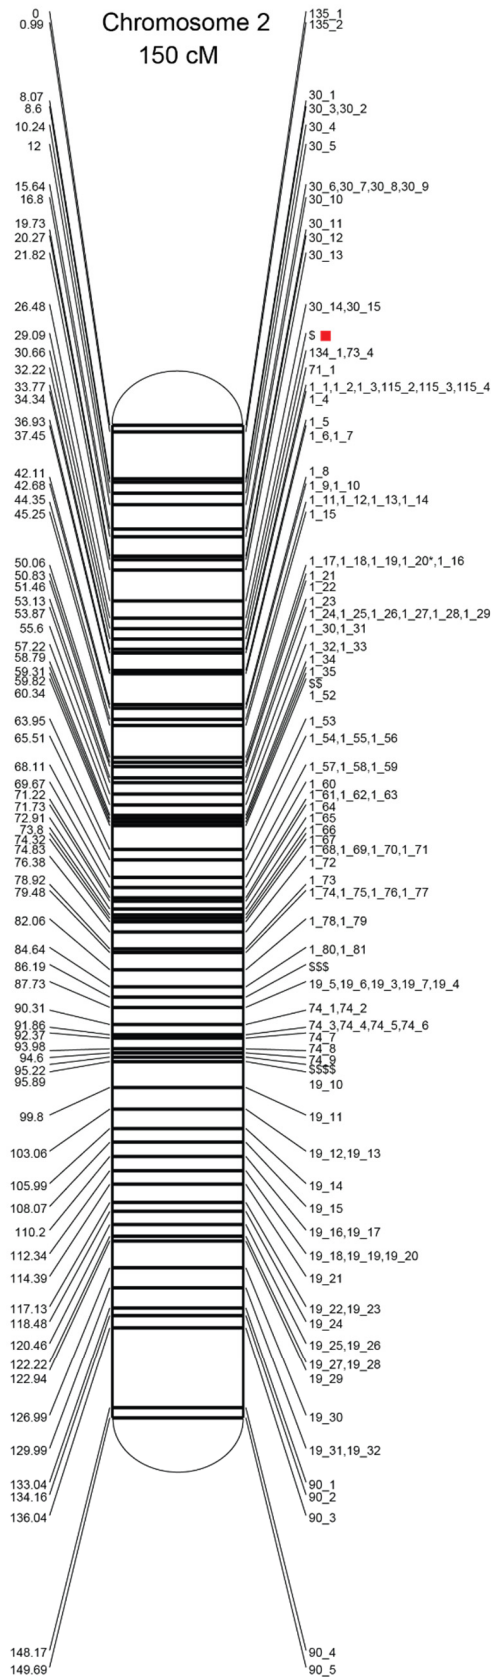

S: 114\_1,114\_3,114\_4,114\_2,117\_1,155\_1,164\_2,164\_1,  
 174\_1,178\_2,178\_1,189\_1,2\_64,2\_65,21\_5,21\_6,21\_7,  
 21\_8,21\_9,21\_10,21\_11,21\_12,21\_13,21\_14,221\_1,  
 238\_1,26\_5,26\_6,26\_7,26\_8,26\_9,26\_10,26\_11,26\_12,  
 26\_13,26\_4,26\_14,33\_3,33\_4,44\_2,44\_3,44\_1,44\_4,44\_5,  
 44\_6,44\_7

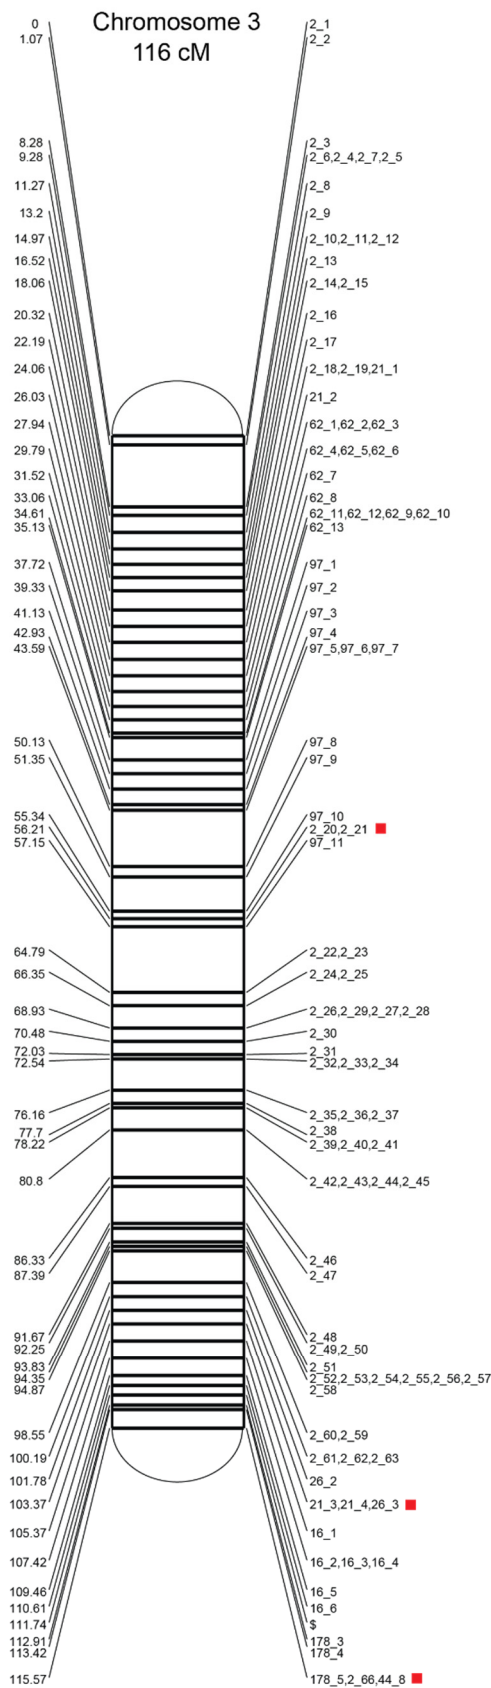

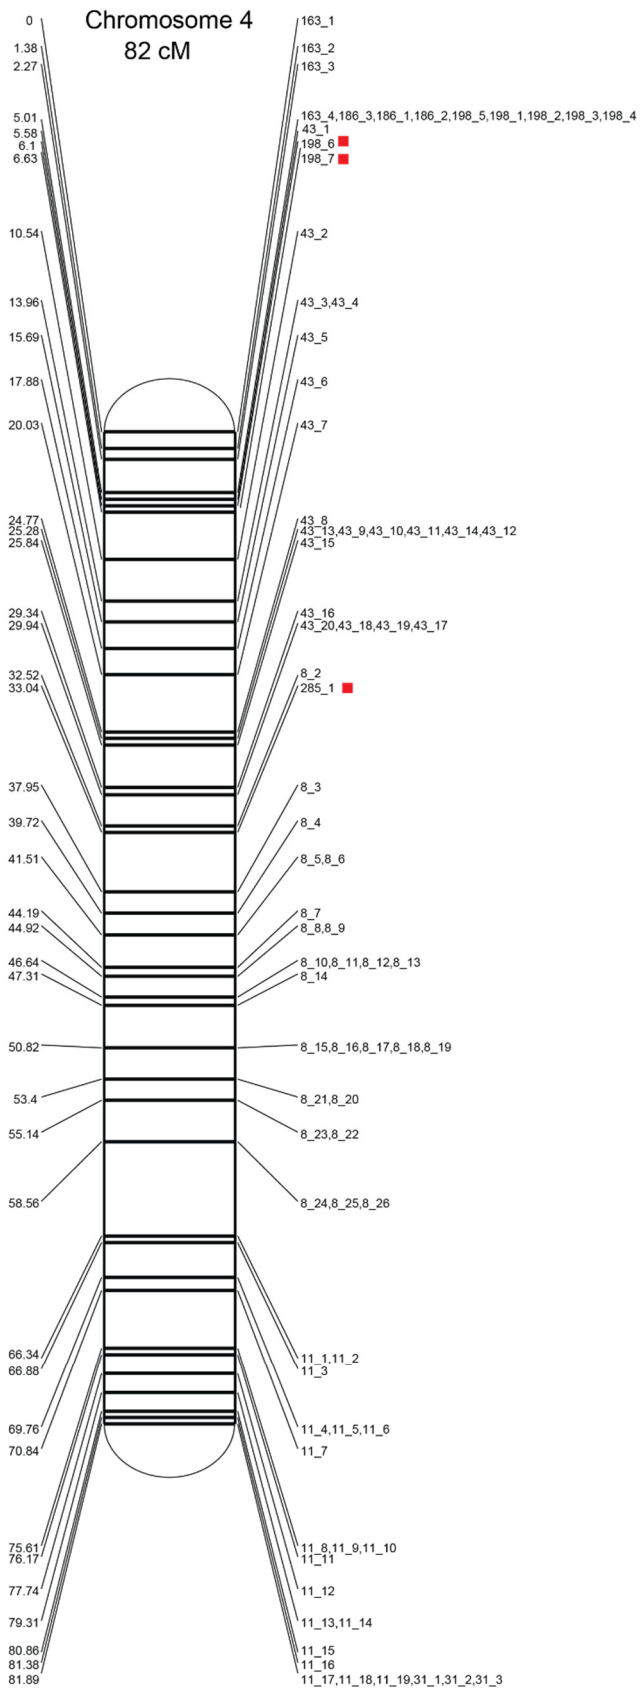

S: 12\_23,12\_24,12\_25,12\_26,12\_27,12\_28,160\_1,38\_1,  
38\_2,38\_3,38\_4,38\_5,38\_6,38\_7,38\_8,38\_9,38\_10,  
38\_11

SS: 125\_1,125\_2,125\_3,157\_4,157\_3,272\_1,307\_1,331\_1,  
331\_2,37\_2,37\_3,37\_4,37\_5,40\_8,40\_9,40\_10,49\_8

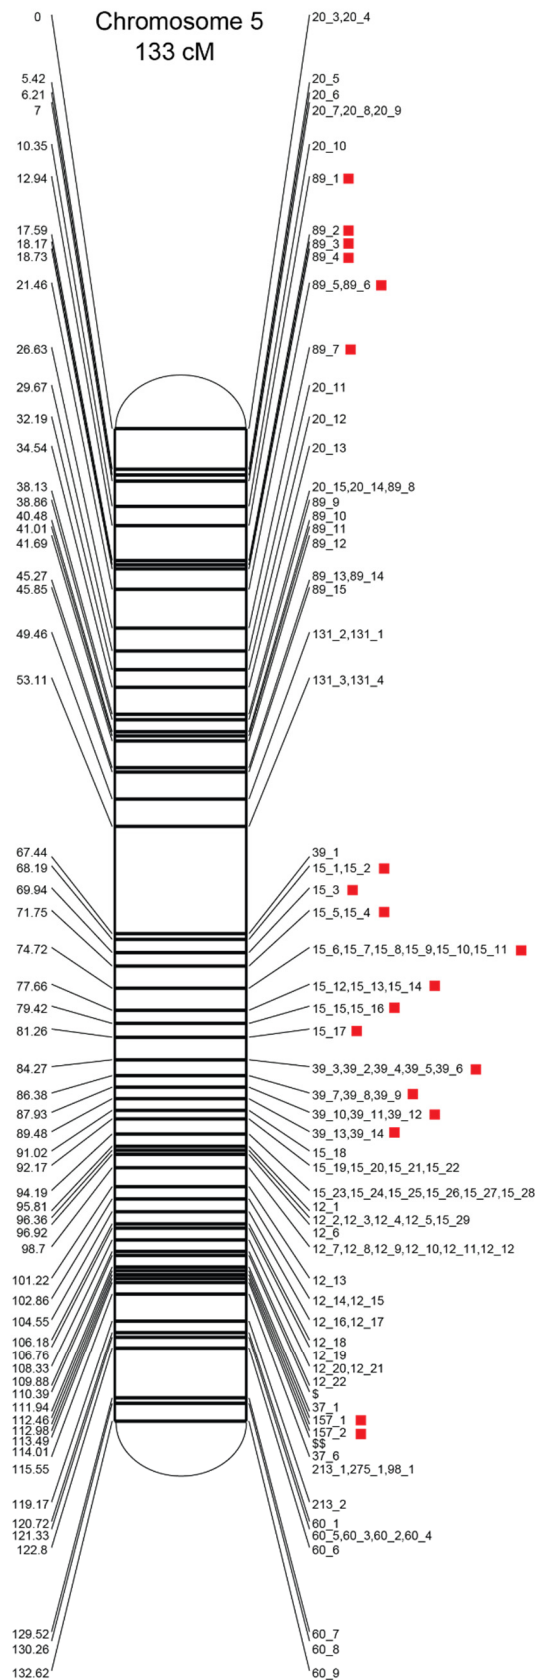

S: 128\_3,128\_4,128\_5,128\_6,128\_7,128\_1,128\_2,230\_1,32\_27,  
 32\_28,32\_17,32\_18,32\_19,32\_20,32\_21,32\_22,32\_23,32\_24,32\_25,  
 32\_26,45\_4,45\_3,57\_3,57\_4,92\_2,92\_1,92\_3,92\_4

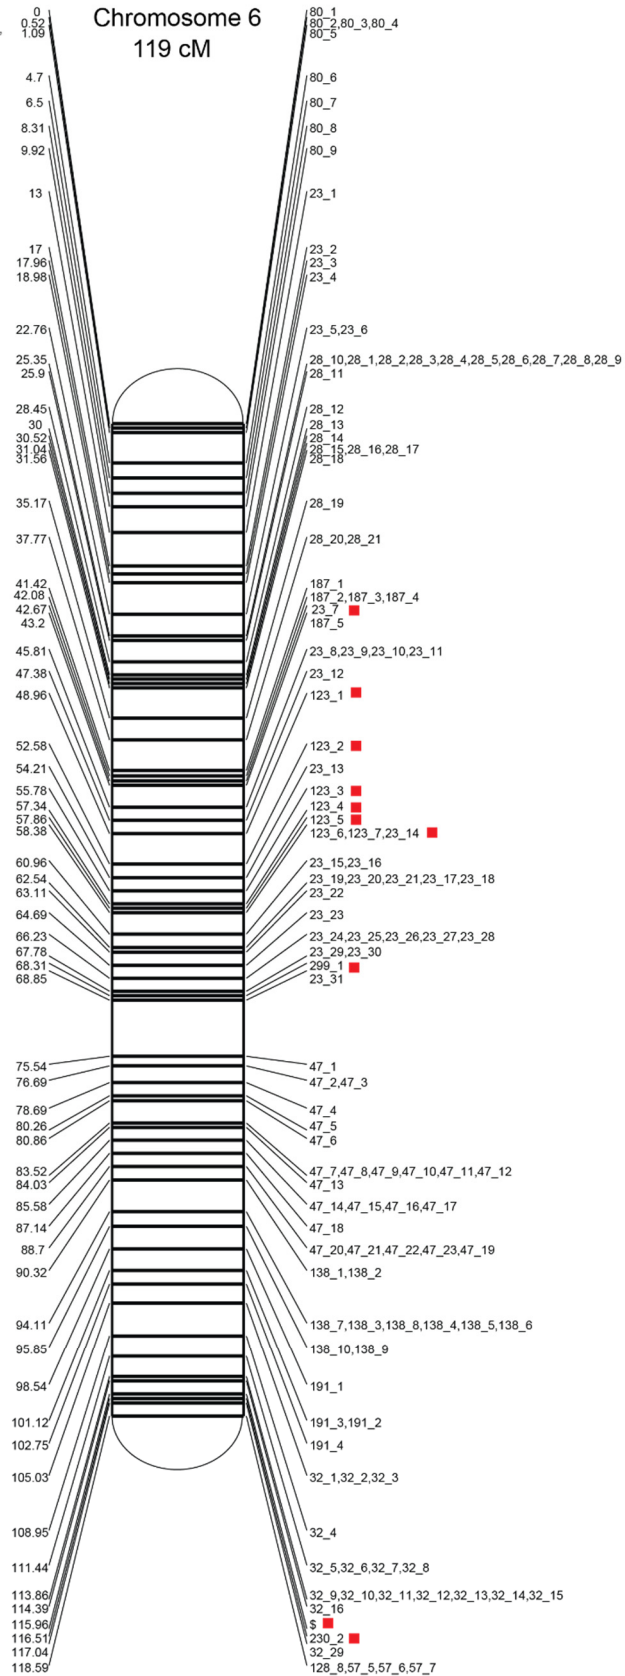

S: 101\_1,101\_2,101\_3,101\_4,133\_2,133\_3,133\_4,133\_1,  
 190\_1,190\_2,40\_3,40\_4,40\_5,40\_6,40\_1,40\_2,48\_2,48\_1,  
 48\_3,48\_4,48\_5,48\_6,48\_7,54\_1,54\_2,54\_3,54\_4,55\_2,  
 55\_3,55\_4,55\_5,55\_6,55\_7,68\_1,68\_2,68\_3,68\_4,68\_5,  
 68\_6,68\_7,68\_8,68\_9,68\_10,68\_11,68\_12,68\_13,68\_14,68\_15,  
 68\_16,68\_17,68\_18,68\_19,68\_20,68\_21,68\_22,68\_23,68\_24,  
 68\_25,68\_26,68\_27,68\_28,68\_29,68\_30,68\_31,68\_32,68\_33,  
 68\_34,68\_35,68\_36,68\_37,68\_38,68\_39,68\_40,68\_41,68\_42,  
 68\_43,68\_44,68\_45,68\_46,68\_47,68\_48,68\_49,68\_50,  
 68\_51,68\_52,68\_53,68\_54,68\_55,68\_56,68\_57,68\_58,68\_59,  
 68\_60,68\_61,68\_62,68\_63,68\_64,68\_65,68\_66,68\_67,68\_68,  
 68\_69,68\_70,68\_71,68\_72,68\_73,68\_74,68\_75,68\_76,  
 68\_77,68\_78,68\_79,68\_80,68\_81,68\_82,68\_83,68\_84,  
 68\_85,68\_86,68\_87,68\_88,68\_89,68\_90,68\_91,68\_92,  
 68\_93,68\_94,68\_95,68\_96,68\_97,68\_98,68\_99,68\_100,  
 68\_101,68\_102,68\_103,68\_104,68\_105,68\_106,68\_107,  
 68\_108,68\_109,68\_110,68\_111,68\_112,68\_113,68\_114,  
 68\_115,68\_116,68\_117,68\_118,68\_119,68\_120,  
 68\_121,68\_122,68\_123,68\_124,68\_125,68\_126,68\_127,  
 68\_128,68\_129,68\_130,68\_131,68\_132,68\_133,68\_134,  
 68\_135,68\_136,68\_137,68\_138,68\_139,68\_140,68\_141,  
 68\_142,68\_143,68\_144,68\_145,68\_146,68\_147,68\_148,  
 68\_149,68\_150,68\_151,68\_152,68\_153,68\_154,68\_155,  
 68\_156,68\_157,68\_158,68\_159,68\_160,68\_161,68\_162,  
 68\_163,68\_164,68\_165,68\_166,68\_167,68\_168,68\_169,  
 68\_170,68\_171,68\_172,68\_173,68\_174,68\_175,68\_176,  
 68\_177,68\_178,68\_179,68\_180,68\_181,68\_182,68\_183,  
 68\_184,68\_185,68\_186,68\_187,68\_188,68\_189,68\_190,  
 68\_191,68\_192,68\_193,68\_194,68\_195,68\_196,68\_197,  
 68\_198,68\_199,68\_200,68\_201,68\_202,68\_203,68\_204,  
 68\_205,68\_206,68\_207,68\_208,68\_209,68\_210,68\_211,  
 68\_212,68\_213,68\_214,68\_215,68\_216,68\_217,68\_218,  
 68\_219,68\_220,68\_221,68\_222,68\_223,68\_224,68\_225,  
 68\_226,68\_227,68\_228,68\_229,68\_230,68\_231,68\_232,  
 68\_233,68\_234,68\_235,68\_236,68\_237,68\_238,68\_239,  
 68\_240,68\_241,68\_242,68\_243,68\_244,68\_245,68\_246,  
 68\_247,68\_248,68\_249,68\_250,68\_251,68\_252,68\_253,  
 68\_254,68\_255,68\_256,68\_257,68\_258,68\_259,68\_260,  
 68\_261,68\_262,68\_263,68\_264,68\_265,68\_266,68\_267,  
 68\_268,68\_269,68\_270,68\_271,68\_272,68\_273,68\_274,  
 68\_275,68\_276,68\_277,68\_278,68\_279,68\_280,68\_281,  
 68\_282,68\_283,68\_284,68\_285,68\_286,68\_287,68\_288,  
 68\_289,68\_290,68\_291,68\_292,68\_293,68\_294,68\_295,  
 68\_296,68\_297,68\_298,68\_299,68\_300,68\_301,68\_302,  
 68\_303,68\_304,68\_305,68\_306,68\_307,68\_308,68\_309,  
 68\_310,68\_311,68\_312,68\_313,68\_314,68\_315,68\_316,  
 68\_317,68\_318,68\_319,68\_320,68\_321,68\_322,68\_323,  
 68\_324,68\_325,68\_326,68\_327,68\_328,68\_329,68\_330,  
 68\_331,68\_332,68\_333,68\_334,68\_335,68\_336,68\_337,  
 68\_338,68\_339,68\_340,68\_341,68\_342,68\_343,68\_344,  
 68\_345,68\_346,68\_347,68\_348,68\_349,68\_350,68\_351,  
 68\_352,68\_353,68\_354,68\_355,68\_356,68\_357,68\_358,  
 68\_359,68\_360,68\_361,68\_362,68\_363,68\_364,68\_365,  
 68\_366,68\_367,68\_368,68\_369,68\_370,68\_371,68\_372,  
 68\_373,68\_374,68\_375,68\_376,68\_377,68\_378,68\_379,  
 68\_380,68\_381,68\_382,68\_383,68\_384,68\_385,68\_386,  
 68\_387,68\_388,68\_389,68\_390,68\_391,68\_392,68\_393,  
 68\_394,68\_395,68\_396,68\_397,68\_398,68\_399,68\_400,  
 68\_401,68\_402,68\_403,68\_404,68\_405,68\_406,68\_407,  
 68\_408,68\_409,68\_410,68\_411,68\_412,68\_413,68\_414,  
 68\_415,68\_416,68\_417,68\_418,68\_419,68\_420,68\_421,  
 68\_422,68\_423,68\_424,68\_425,68\_426,68\_427,68\_428,  
 68\_429,68\_430,68\_431,68\_432,68\_433,68\_434,68\_435,  
 68\_436,68\_437,68\_438,68\_439,68\_440,68\_441,68\_442,  
 68\_443,68\_444,68\_445,68\_446,68\_447,68\_448,68\_449,  
 68\_450,68\_451,68\_452,68\_453,68\_454,68\_455,68\_456,  
 68\_457,68\_458,68\_459,68\_460,68\_461,68\_462,68\_463,  
 68\_464,68\_465,68\_466,68\_467,68\_468,68\_469,68\_470,  
 68\_471,68\_472,68\_473,68\_474,68\_475,68\_476,68\_477,  
 68\_478,68\_479,68\_480,68\_481,68\_482,68\_483,68\_484,  
 68\_485,68\_486,68\_487,68\_488,68\_489,68\_490,68\_491,  
 68\_492,68\_493,68\_494,68\_495,68\_496,68\_497,68\_498,  
 68\_499,68\_500,68\_501,68\_502,68\_503,68\_504,68\_505,  
 68\_506,68\_507,68\_508,68\_509,68\_510,68\_511,68\_512,  
 68\_513,68\_514,68\_515,68\_516,68\_517,68\_518,68\_519,  
 68\_520,68\_521,68\_522,68\_523,68\_524,68\_525,68\_526,  
 68\_527,68\_528,68\_529,68\_530,68\_531,68\_532,68\_533,  
 68\_534,68\_535,68\_536,68\_537,68\_538,68\_539,68\_540,  
 68\_541,68\_542,68\_543,68\_544,68\_545,68\_546,68\_547,  
 68\_548,68\_549,68\_550,68\_551,68\_552,68\_553,68\_554,  
 68\_555,68\_556,68\_557,68\_558,68\_559,68\_560,68\_561,  
 68\_562,68\_563,68\_564,68\_565,68\_566,68\_567,68\_568,  
 68\_569,68\_570,68\_571,68\_572,68\_573,68\_574,68\_575,  
 68\_576,68\_577,68\_578,68\_579,68\_580,68\_581,68\_582,  
 68\_583,68\_584,68\_585,68\_586,68\_587,68\_588,68\_589,  
 68\_590,68\_591,68\_592,68\_593,68\_594,68\_595,68\_596,  
 68\_597,68\_598,68\_599,68\_600,68\_601,68\_602,68\_603,  
 68\_604,68\_605,68\_606,68\_607,68\_608,68\_609,68\_610,  
 68\_611,68\_612,68\_613,68\_614,68\_615,68\_616,68\_617,  
 68\_618,68\_619,68\_620,68\_621,68\_622,68\_623,68\_624,  
 68\_625,68\_626,68\_627,68\_628,68\_629,68\_630,68\_631,  
 68\_632,68\_633,68\_634,68\_635,68\_636,68\_637,68\_638,  
 68\_639,68\_640,68\_641,68\_642,68\_643,68\_644,68\_645,  
 68\_646,68\_647,68\_648,68\_649,68\_650,68\_651,68\_652,  
 68\_653,68\_654,68\_655,68\_656,68\_657,68\_658,68\_659,  
 68\_660,68\_661,68\_662,68\_663,68\_664,68\_665,68\_666,  
 68\_667,68\_668,68\_669,68\_670,68\_671,68\_672,68\_673,  
 68\_674,68\_675,68\_676,68\_677,68\_678,68\_679,68\_680,  
 68\_681,68\_682,68\_683,68\_684,68\_685,68\_686,68\_687,  
 68\_688,68\_689,68\_690,68\_691,68\_692,68\_693,68\_694,  
 68\_695,68\_696,68\_697,68\_698,68\_699,68\_700,68\_701,  
 68\_702,68\_703,68\_704,68\_705,68\_706,68\_707,68\_708,  
 68\_709,68\_710,68\_711,68\_712,68\_713,68\_714,68\_715,  
 68\_716,68\_717,68\_718,68\_719,68\_720,68\_721,68\_722,  
 68\_723,68\_724,68\_725,68\_726,68\_727,68\_728,68\_729,  
 68\_730,68\_731,68\_732,68\_733,68\_734,68\_735,68\_736,  
 68\_737,68\_738,68\_739,68\_740,68\_741,68\_742,68\_743,  
 68\_744,68\_745,68\_746,68\_747,68\_748,68\_749,68\_750,  
 68\_751,68\_752,68\_753,68\_754,68\_755,68\_756,68\_757,  
 68\_758,68\_759,68\_760,68\_761,68\_762,68\_763,68\_764,  
 68\_765,68\_766,68\_767,68\_768,68\_769,68\_770,68\_771,  
 68\_772,68\_773,68\_774,68\_775,68\_776,68\_777,68\_778,  
 68\_779,68\_780,68\_781,68\_782,68\_783,68\_784,68\_785,  
 68\_786,68\_787,68\_788,68\_789,68\_790,68\_791,68\_792,  
 68\_793,68\_794,68\_795,68\_796,68\_797,68\_798,68\_799,  
 68\_800,68\_801,68\_802,68\_803,68\_804,68\_805,68\_806,  
 68\_807,68\_808,68\_809,68\_810,68\_811,68\_812,68\_813,  
 68\_814,68\_815,68\_816,68\_817,68\_818,68\_819,68\_820,  
 68\_821,68\_822,68\_823,68\_824,68\_825,68\_826,68\_827,  
 68\_828,68\_829,68\_830,68\_831,68\_832,68\_833,68\_834,  
 68\_835,68\_836,68\_837,68\_838,68\_839,68\_840,68\_841,  
 68\_842,68\_843,68\_844,68\_845,68\_846,68\_847,68\_848,  
 68\_849,68\_850,68\_851,68\_852,68\_853,68\_854,68\_855,  
 68\_856,68\_857,68\_858,68\_859,68\_860,68\_861,68\_862,  
 68\_863,68\_864,68\_865,68\_866,68\_867,68\_868,68\_869,  
 68\_870,68\_871,68\_872,68\_873,68\_874,68\_875,68\_876,  
 68\_877,68\_878,68\_879,68\_880,68\_881,68\_882,68\_883,  
 68\_884,68\_885,68\_886,68\_887,68\_888,68\_889,68\_890,  
 68\_891,68\_892,68\_893,68\_894,68\_895,68\_896,68\_897,  
 68\_898,68\_899,68\_900,68\_901,68\_902,68\_903,68\_904,  
 68\_905,68\_906,68\_907,68\_908,68\_909,68\_910,68\_911,  
 68\_912,68\_913,68\_914,68\_915,68\_916,68\_917,68\_918,  
 68\_919,68\_920,68\_921,68\_922,68\_923,68\_924,68\_925,  
 68\_926,68\_927,68\_928,68\_929,68\_930,68\_931,68\_932,  
 68\_933,68\_934,68\_935,68\_936,68\_937,68\_938,68\_939,  
 68\_940,68\_941,68\_942,68\_943,68\_944,68\_945,68\_946,  
 68\_947,68\_948,68\_949,68\_950,68\_951,68\_952,68\_953,  
 68\_954,68\_955,68\_956,68\_957,68\_958,68\_959,68\_960,  
 68\_961,68\_962,68\_963,68\_964,68\_965,68\_966,68\_967,  
 68\_968,68\_969,68\_970,68\_971,68\_972,68\_973,68\_974,  
 68\_975,68\_976,68\_977,68\_978,68\_979,68\_980,68\_981,  
 68\_982,68\_983,68\_984,68\_985,68\_986,68\_987,68\_988,  
 68\_989,68\_990,68\_991,68\_992,68\_993,68\_994,68\_995,  
 68\_996,68\_997,68\_998,68\_999,68\_1000,68\_1001,68\_1002,  
 68\_1003,68\_1004,68\_1005,68\_1006,68\_1007,68\_1008,  
 68\_1009,68\_1010,68\_1011,68\_1012,68\_1013,68\_1014,  
 68\_1015,68\_1016,68\_1017,68\_1018,68\_1019,68\_1020,  
 68\_1021,68\_1022,68\_1023,68\_1024,68\_1025,68\_1026,  
 68\_1027,68\_1028,68\_1029,68\_1030,68\_1031,68\_1032,  
 68\_1033,68\_1034,68\_1035,68\_1036,68\_1037,68\_1038,  
 68\_1039,68\_1040,68\_1041,68\_1042,68\_1043,68\_1044,  
 68\_1045,68\_1046,68\_1047,68\_1048,68\_1049,68\_1050,  
 68\_1051,68\_1052,68\_1053,68\_1054,68\_1055,68\_1056,  
 68\_1057,68\_1058,68\_1059,68\_1060,68\_1061,68\_1062,  
 68\_1063,68\_1064,68\_1065,68\_1066,68\_1067,68\_1068,  
 68\_1069,68\_1070,68\_1071,68\_1072,68\_1073,68\_1074,  
 68\_1075,68\_1076,68\_1077,68\_1078,68\_1079,68\_1080,  
 68\_1081,68\_1082,68\_1083,68\_1084,68\_1085,68\_1086,  
 68\_1087,68\_1088,68\_1089,68\_1090,68\_1091,68\_1092,  
 68\_1093,68\_1094,68\_1095,68\_1096,68\_1097,68\_1098,  
 68\_1099,68\_1100,68\_1101,68\_1102,68\_1103,68\_1104,  
 68\_1105,68\_1106,68\_1107,68\_1108,68\_1109,68\_1110,  
 68\_1111,68\_1112,68\_1113,68\_1114,68\_1115,68\_1116,  
 68\_1117,68\_1118,68\_1119,68\_1120,68\_1121,68\_1122,  
 68\_1123,68\_1124,68\_1125,68\_1126,68\_1127,68\_1128,  
 68\_1129,68\_1130,68\_1131,68\_1132,68\_1133,68\_1134,  
 68\_1135,68\_1136,68\_1137,68\_1138,68\_1139,68\_1140,  
 68\_1141,68\_1142,68\_1143,68\_1144,68\_1145,68\_1146,  
 68\_1147,68\_1148,68\_1149,68\_1150,68\_1151,68\_1152,  
 68\_1153,68\_1154,68\_1155,68\_1156,68\_1157,68\_1158,  
 68\_1159,68\_1160,68\_1161,68\_1162,68\_1163,68\_1164,  
 68\_1165,68\_1166,68\_1167,68\_1168,68\_1169,68\_1170,  
 68\_1171,68\_1172,68\_1173,68\_1174,68\_1175,68\_1176,  
 68\_1177,68\_1178,68\_1179,68\_1180,68\_1181,68\_1182,  
 68\_1183,68\_1184,68\_1185,68\_1186,68\_1187,68\_1188,  
 68\_1189,68\_1190,68\_1191,68\_1192,68\_1193,68\_1194,  
 68\_1195,68\_1196,68\_1197,68\_1198,68\_1199,68\_1200,  
 68\_1201,68\_1202,68\_1203,68\_1204,68\_1205,68\_1206,  
 68\_1207,68\_1208,68\_1209,68\_1210,68\_1211,68\_1212,  
 68\_1213,68\_1214,68\_1215,68\_1216,68\_1217,68\_1218,  
 68\_1219,68\_1220,68\_1221,68\_1222,68\_1223,68\_1224,  
 68\_1225,68\_1226,68\_1227,68\_1228,68\_1229,68\_1230,  
 68\_1231,68\_1232,68\_1233,68\_1234,68\_1235,68\_1236,  
 68\_1237,68\_1238,68\_1239,68\_1240,68\_1241,68\_1242,  
 68\_1243,68\_1244,68\_1245,68\_1246,68\_1247,68\_1248,  
 68\_1249,68\_1250,68\_1251,68\_1252,68\_1253,68\_1254,  
 68\_1255,68\_1256,68\_1257,68\_1258,68\_1259,68\_1260,  
 68\_1261,68\_1262,68\_1263,68\_1264,68\_1265,68\_1266,  
 68\_1267,68\_1268,68\_1269,68\_1270,68\_1271,68\_1272,  
 68\_1273,68\_1274,68\_1275,68\_1276,68\_1277,68\_1278,  
 68\_1279,68\_1280,68\_1281,68\_1282,68\_1283,68\_1284,  
 68\_1285,68\_1286,68\_1287,68\_1288,68\_1289,68\_1290,  
 68\_1291,68\_1292,68\_1293,68\_1294,68\_1295,68\_1296,  
 68\_1297,68\_1298,68\_1299,68\_1300,68\_1301,68\_1302,  
 68\_1303,68\_1304,68\_1305,68\_1306,68\_1307,68\_1308,  
 68\_1309,68\_1310,68\_1311,68\_1312,68\_1313,68\_1314,  
 68\_1315,68\_1316,68\_1317,68\_1318,68\_1319,68\_1320,  
 68\_1321,68\_1322,68\_1323,68\_1324,68\_1325,68\_1326,  
 68\_1327,68\_1328,68\_1329,68\_1330,68\_1331,68\_1332,  
 68\_1333,68\_1334,68\_1335,68\_1336,68\_1337,68\_1338,  
 68\_1339,68\_1340,68\_1341,68\_1342,68\_1343,68\_1344,  
 68\_1345,68\_1346,68\_1347,68\_1348,68\_1349,68\_1350,  
 68\_1351,68\_1352,68\_1353,68\_1354,68\_1355,68\_1356,  
 68\_1357,68\_1358,68\_1359,68\_1360,68\_1361,68\_1362,  
 68\_1363,68\_1364,68\_1365,68\_1366,68\_1367,68\_1368,  
 68\_1369,68\_1370,68\_1371,68\_1372,68\_1373,68\_1374,  
 68\_1375,68\_1376,68\_1377,68\_1378,68\_1379,68\_1380,  
 68\_1381,68\_1382,68\_1383,68\_1384,68\_1385,68\_1386,  
 68\_1387,68\_1388,68\_1389,68\_1390,68\_1391,68\_1392,  
 68\_1393,68\_1394,68\_1395,68\_1396,68\_1397,68\_1398,  
 68\_1399,68\_1400,68\_1401,68\_1402,68\_1403,68\_1404,  
 68\_1405,68\_1406,68\_1407,68\_1408,68\_1409,68\_1410,  
 68\_1411,68\_1412,68\_1413,68\_1414,68\_1415,68\_1416,  
 68\_1417,68\_1418,68\_1419,68\_1420,68\_1421,68\_1422,  
 68\_1423,68\_1424,68\_1425,68\_1426,68\_1427,68\_1428,  
 68\_1429,68\_1430,68\_1431,68\_1432,68\_1433,68\_1434,  
 68\_1435,68\_1436,68\_1437,68\_1438,68\_1439,68\_1440,  
 68\_1441,68\_1442,68\_1443,68\_1444,68\_1445,68\_1446,  
 68\_1447,68\_1448,68\_1449,68\_1450,68\_1451,68\_1452,  
 68\_1453,68\_1454,68\_1455,68\_1456,68\_1457,68\_1458,  
 68\_1459,68\_1460,68\_1461,68\_1462,68\_1463,68\_1464,  
 68\_1465,68\_1466,68\_1467,68\_1468,68\_1469,68\_1470,  
 68\_1471,68\_1472,68\_1473,68\_1474,68\_1475,68\_1476,  
 68\_1477,68\_1478,68\_1479,68\_1480,68\_1481,68\_1482,  
 68\_1483,68\_1484,68\_1485,68\_1486,68\_1487,68\_1488,  
 68\_1489,68\_1490,68\_1491,68\_1492,68\_1493,68\_1494,  
 68\_1495,68\_1496,68\_1497,68\_1498,68\_1499,68\_1500,  
 68\_1501,68\_1502,68\_1503,68\_1504,68\_1505,68\_1506,  
 68\_1507,68\_1508,68\_1509,68\_1510,68\_1511,68\_1512,  
 68\_1513,68\_1514,68\_1515,68\_1516,68\_1517,



S: 109\_1,109\_2,128\_1,169\_2,169\_3,169\_1,199\_1,199\_2,20\_2,  
 20\_1,22\_2,22\_3,22\_4,226\_5,226\_3,226\_4,247\_1,291\_2,34\_2,  
 52\_6,52\_5,52\_7,57\_1,57\_2,76\_23,76\_24,76\_25,77\_4,  
 77\_5,77\_6,77\_7,77\_8,77\_9,77\_10,77\_11,77\_12,77\_13,77\_14,  
 77\_15,94\_3,94\_4,94\_5

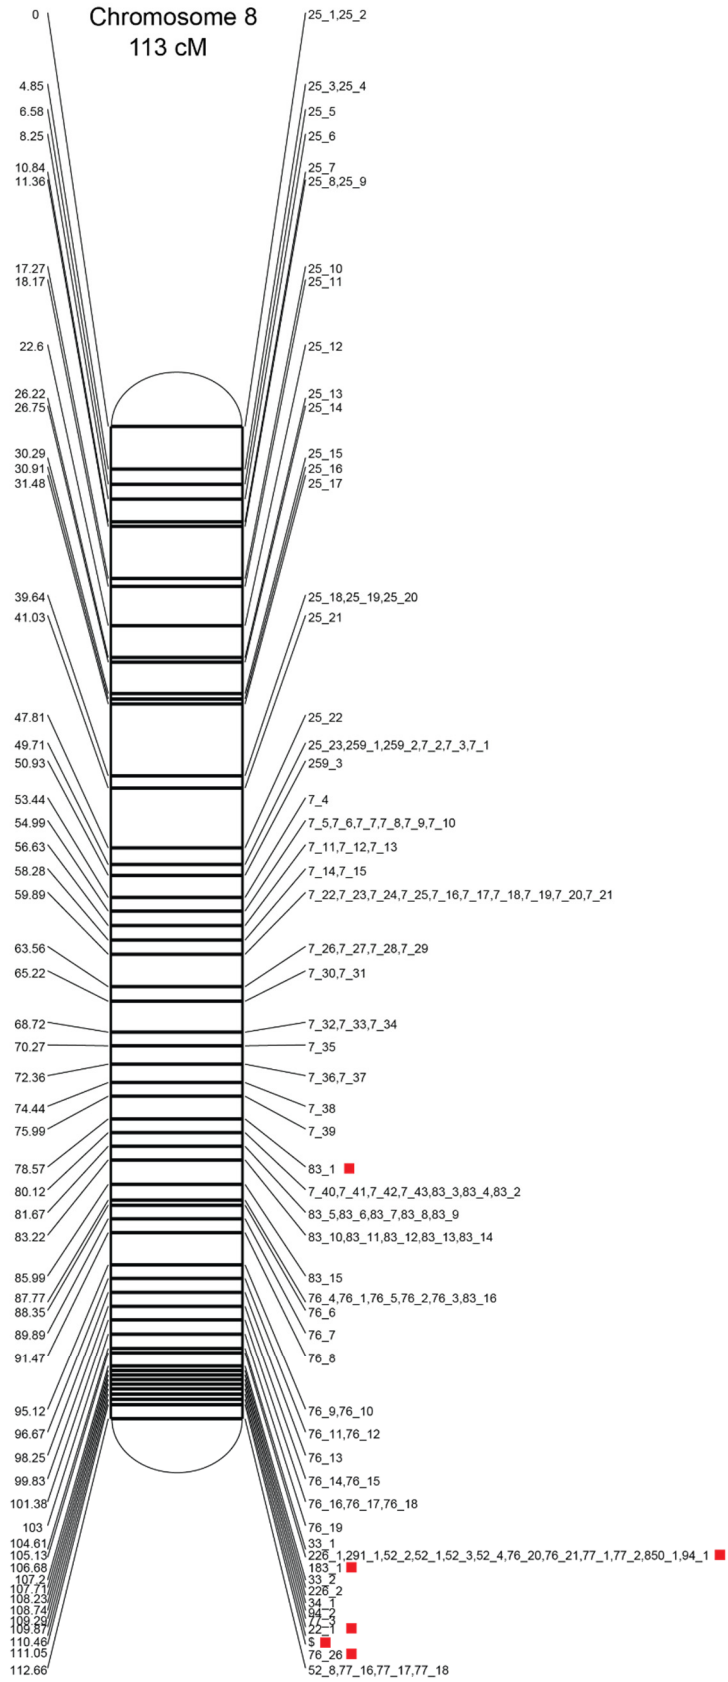

\$: 104\_1,107\_2,107\_3,107\_4,107\_5,107\_1,118\_1,118\_2,  
 139\_1,14\_7,14\_2,14\_3,14\_4,14\_5,14\_6,172\_1,  
 289\_1,41\_2,41\_3,41\_4,41\_5,41\_6,41\_7,95\_1,95\_2,  
 99\_2

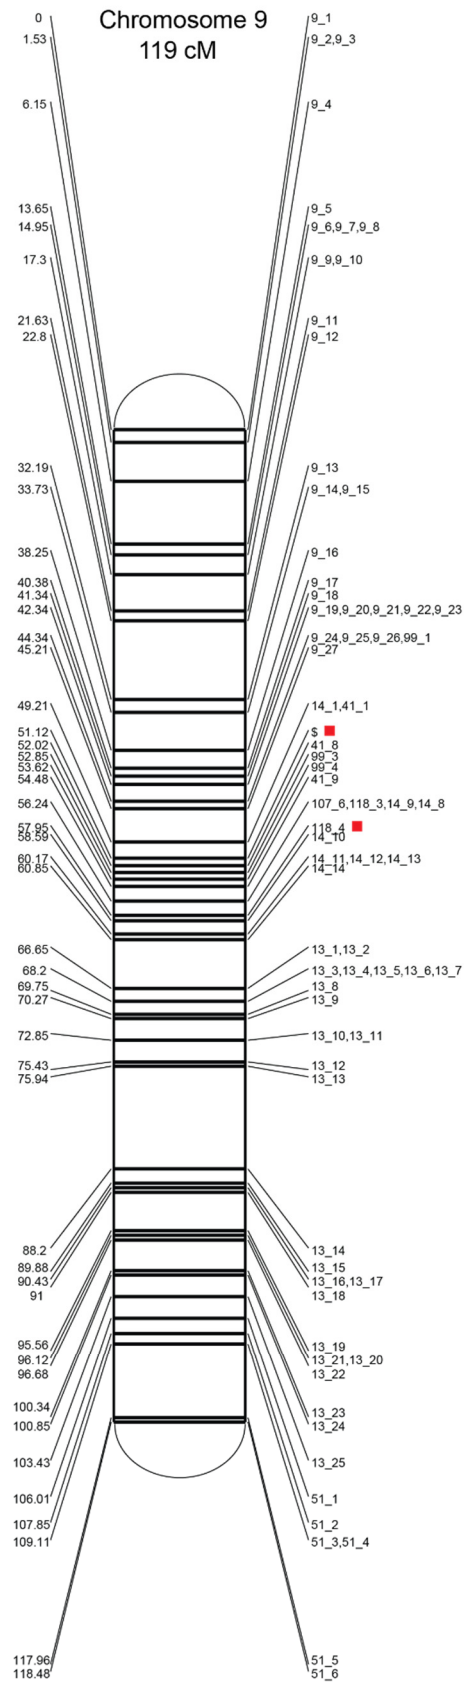

\$: 102\_2,102\_1,103\_1,103\_2,152\_1,152\_2,35\_2,  
 35\_3,35\_4,35\_1,35\_5,35\_6,35\_7,56\_2,56\_3,  
 56\_4,56\_5,56\_6,56\_7,56\_8,56\_9,56\_10,56\_1,  
 88\_6,88\_7,88\_8,88\_9,88\_4,88\_5  
 \$\$: 105\_1,120\_1,176\_1,223\_2,223\_1,26\_1,49\_4,49\_5,  
 49\_6,49\_7,49\_2,49\_3,64\_1,64\_2,64\_3,64\_4,64\_5,64\_6,  
 65\_1,79\_2,79\_3,79\_4,79\_5

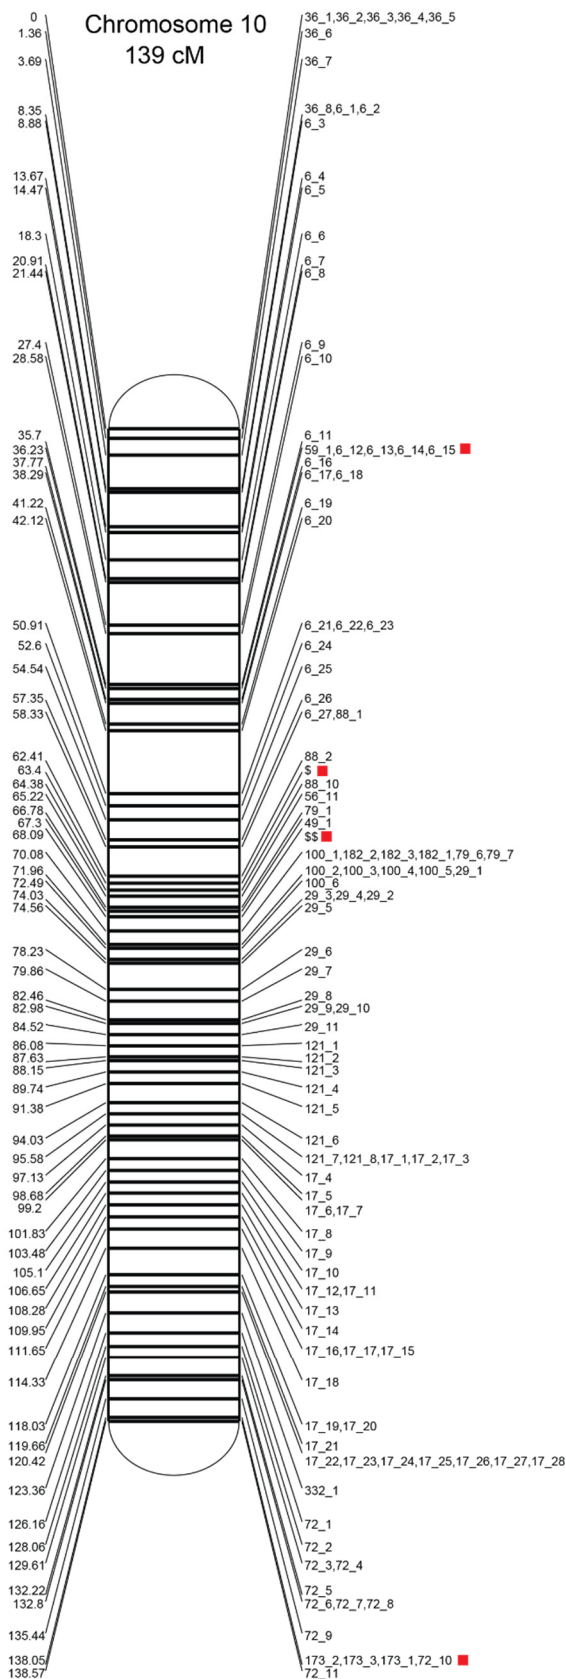

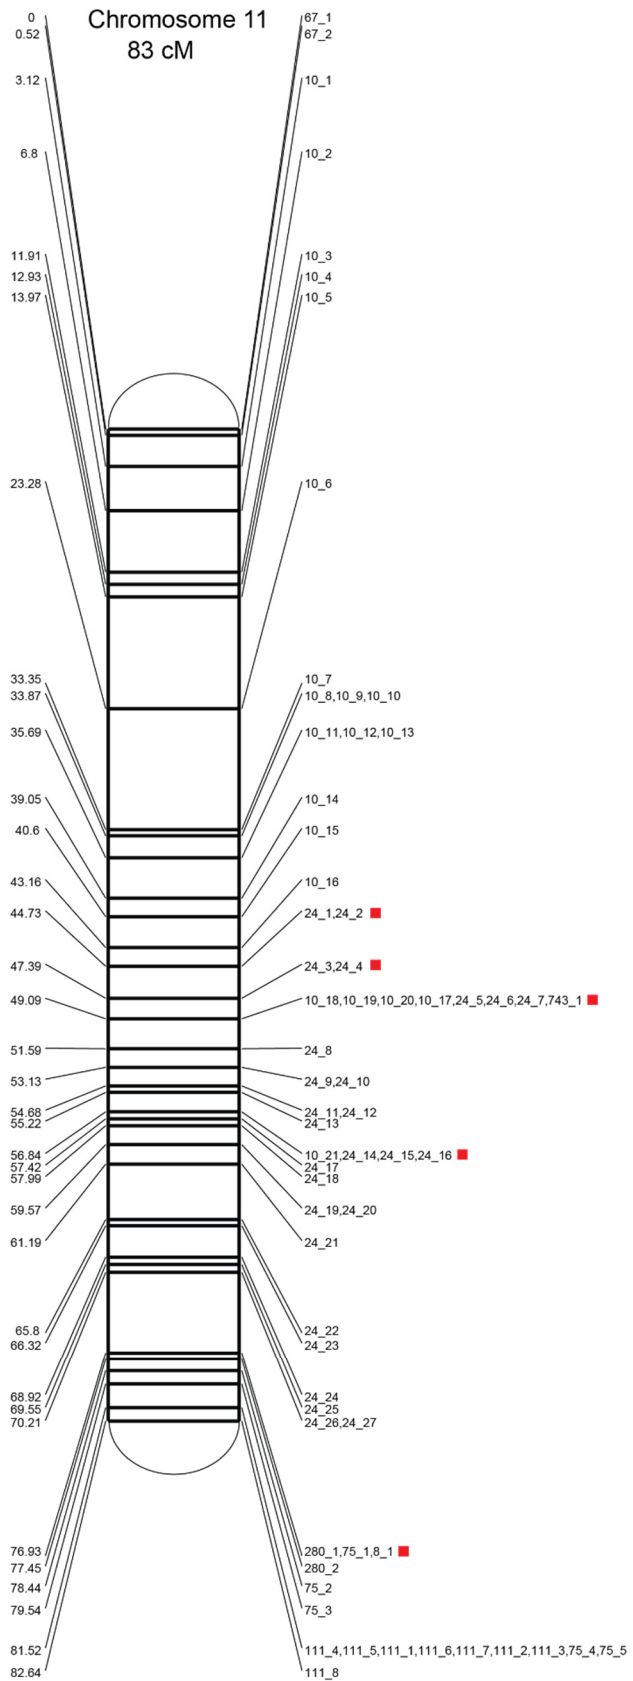

S: 146\_2,146\_3,146\_1,158\_1,158\_2,161\_2,161\_3,161\_1,  
 27\_6,27\_2,27\_3,27\_4,27\_5,58\_7,58\_8,58\_9,58\_5,58\_6,  
 59\_4,59\_5,59\_6,59\_7,63\_14,84\_2,84\_1

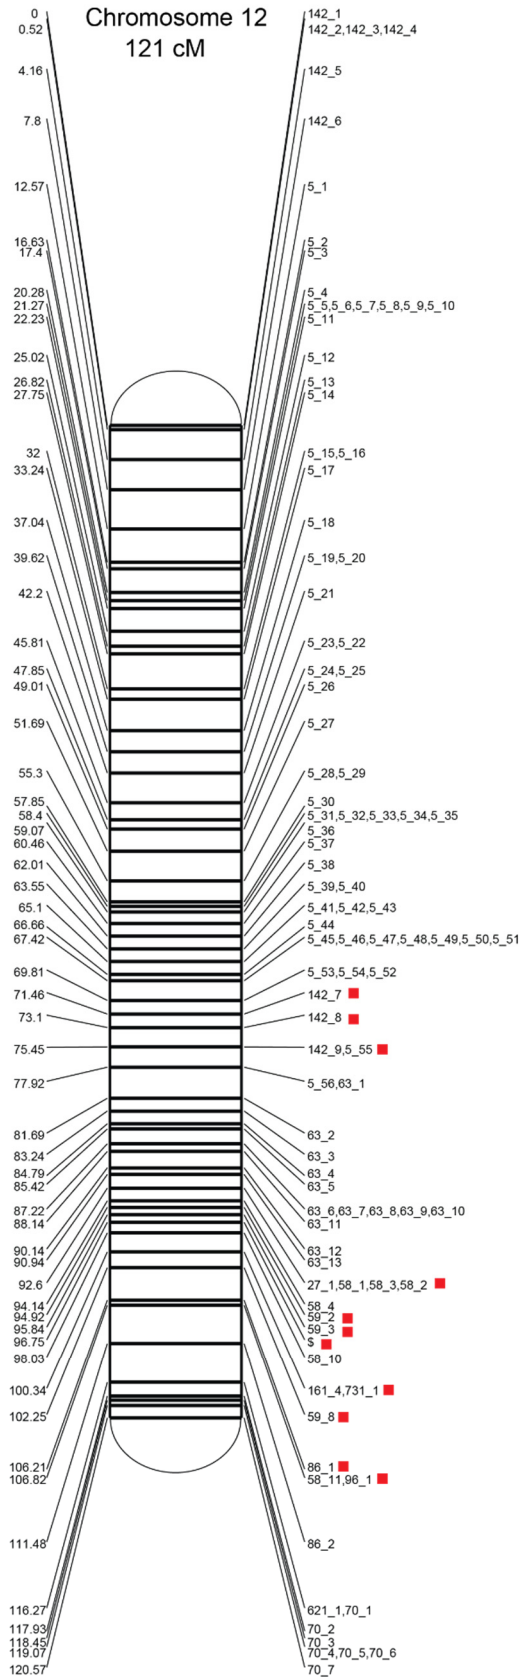

Supplement: 10.1534_115.179028_genetics.115.179028-7.pdf [file 10.1534_115.179028_genetics.115.179028-7.pdf]
